# Supplementary material for: CD229 (Ly9) a Novel Biomarker for B-Cell Malignancies and Multiple Myeloma
Source: MDPI journal article supplement (doi:10.3390/cancers14092154), 2022-04-26
Supplement: s1 [file s1]

# Supplementary Material: CD229 (Ly9) a Novel Biomarker for B-Cell Malignancies and Multiple Myeloma

Giovanna Roncador, Joan Puñet-Ortiz, Lorena Maestre, Luis Gerardo Rodríguez-Lobato, Scherezade Jiménez, Ana Isabel Reyes-García, Álvaro García-González, Juan F. García, Miguel Ángel Piris, Santiago Montes-Moreno, Manuel Rodríguez-Justo, Mari-Pau Mena, Carlos Fernández de Larrea and Pablo Engel

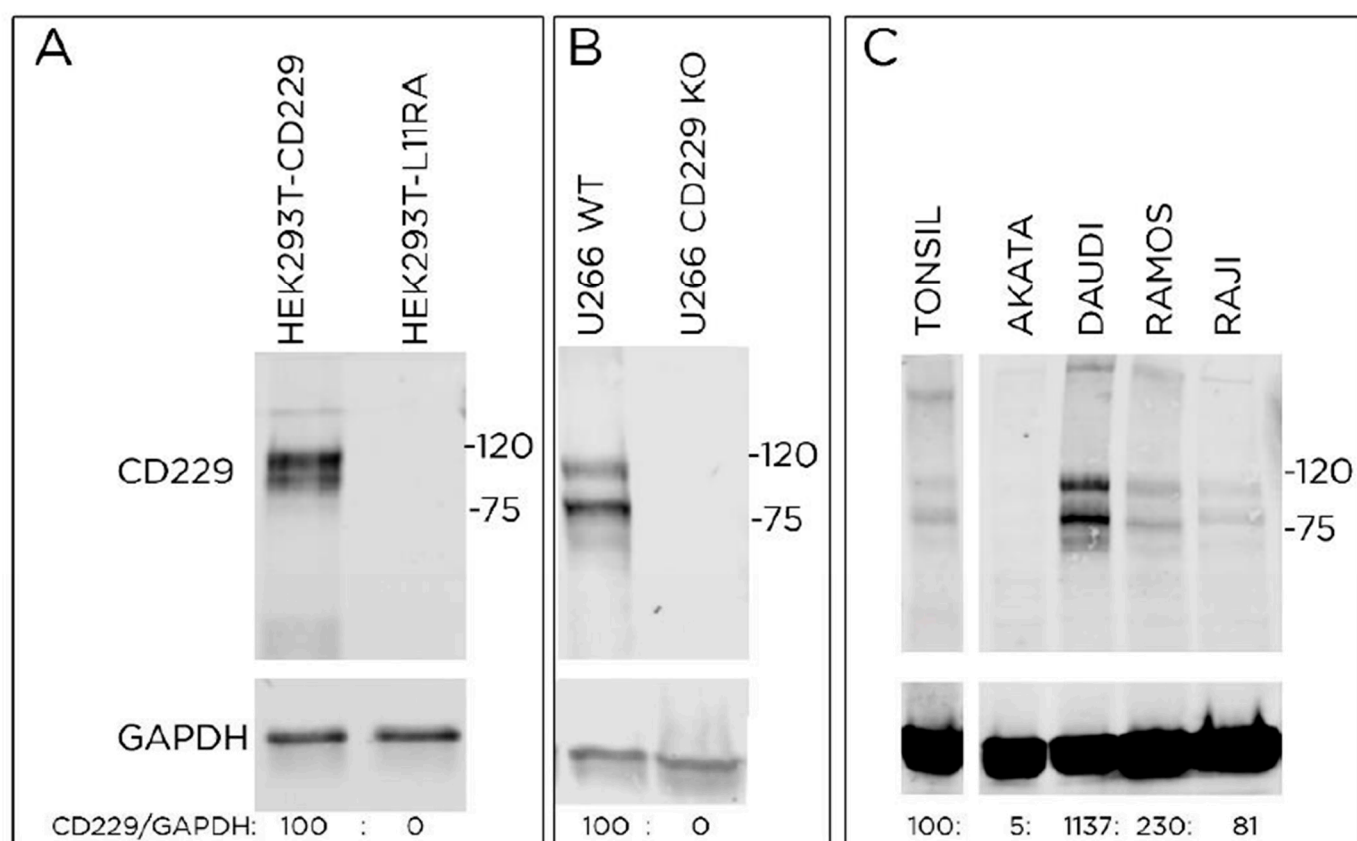

**Figure S1.** Western blot analysis of PIZCU426A mAb reactivity. (A) CD229 transfected HEK293T versus HEK293T cells transfected with an unrelated protein (IL11RA); (B) U266 WT versus U266 CD229 deficient (KO) cells and (C) tonsil and CD229 positive B cell lines (DAUDI, RAMOS and RAJI) and negative cell line AKATA. Densitometry reading/intensity ratio of each band are included. Uncut blots are available in Figure S4.

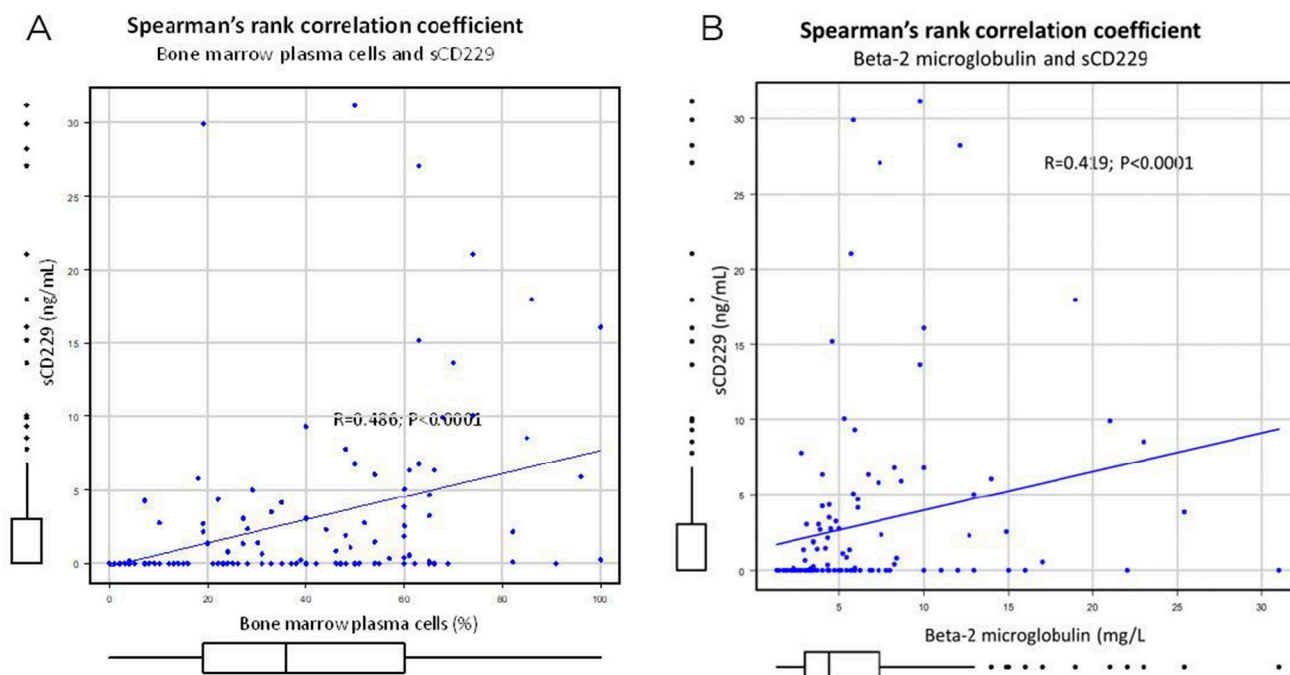

**Figure S2.** Scatter plot showing correlation between the percentage of bone marrow plasma cells (A) serum  $\beta 2$  microglobulin (B) and sCD229 in 122 newly diagnosed multiple myeloma patients.

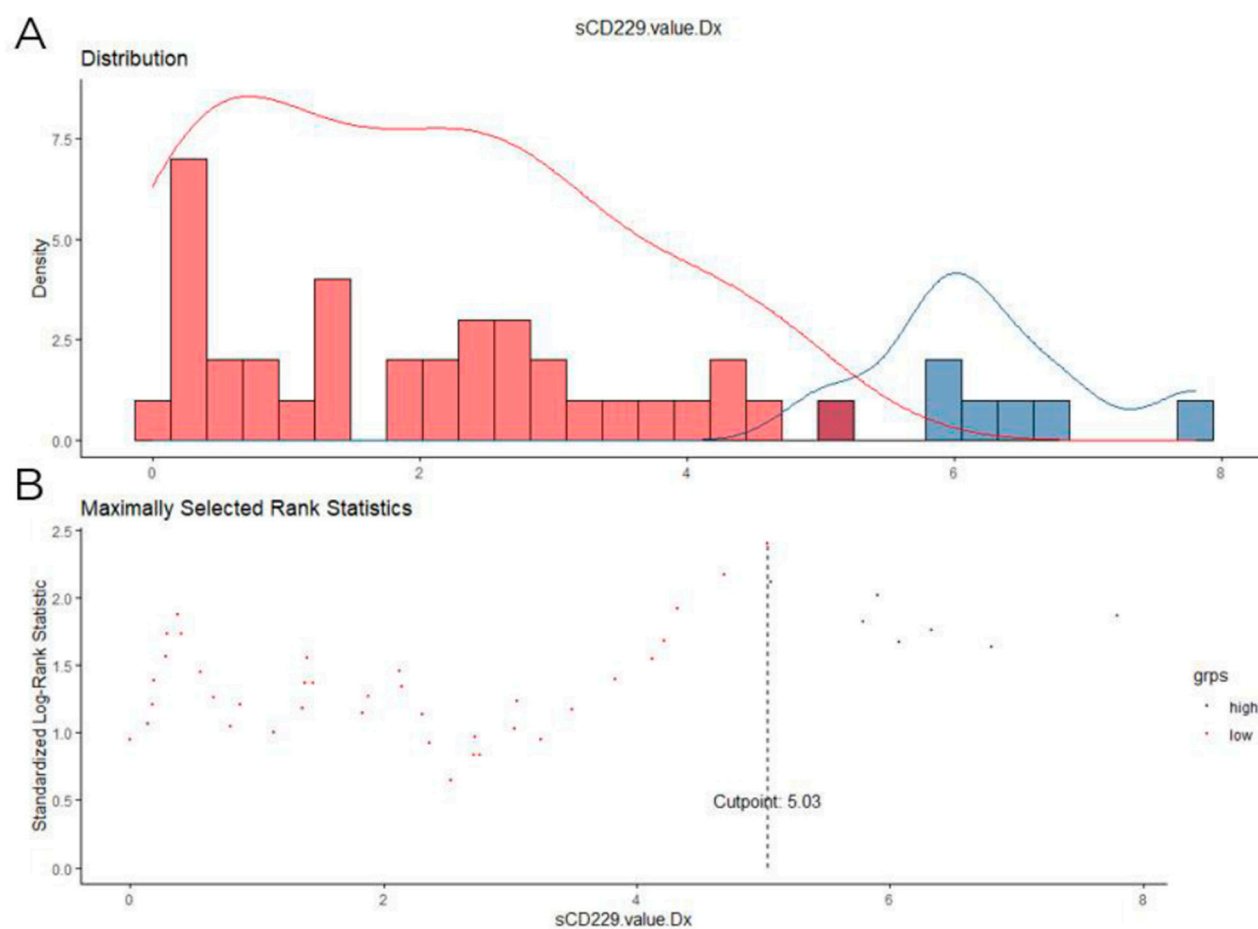

**Figure S3.** Identification of the best cut-off value of the soluble CD229 to predict overall survival using the maximally selected rank statistics from the “maxstat” and “survminer” R packages. The

x-axis represents the value of sCD229 (**A** and **B**), while the y-axis represents the number of samples (**A**) and the results of the log rank test for overall survival (**B**).

**Table S1.** Multivariate analysis for PFS and OS.

| Multivariate analysis for PFS |       |           |        |
|-------------------------------|-------|-----------|--------|
| Variable                      | HR    | 95% CI    | P      |
| Age                           | 1.03  | 1.01–1.06 | 0.003  |
| Hemoglobin                    | 1.00  | 0.99–1.02 | 0.67   |
| Albumin                       | 0.99  | 0.95–1.03 | 0.60   |
| $\beta$ 2-microglobulin       | 1.06  | 1.02–1.10 | 0.003  |
| sCD229 > 5.0 ng/mL            | 1.56  | 0.92–2.67 | 0.10   |
| Multivariate analysis for OS  |       |           |        |
| Age                           | 1.05  | 1.02–1.08 | 0.002  |
| Hemoglobin                    | 1.002 | 0.98–1.02 | 0.88   |
| Albumin                       | 0.99  | 0.93–1.05 | 0.68   |
| $\beta$ 2-microglobulin       | 1.09  | 1.04–1.15 | <0.001 |
| sCD229 > 5.0 ng/mL            | 1.62  | 0.82–3.22 | 0.16   |

CI: confidence interval; HR: hazard ratio.

**Table S2.** Antibodies used in the study.

| Molecule | Antibody Type                  | Clone Name | Source |
|----------|--------------------------------|------------|--------|
| CD20     | Recombinant rabbit mono-clonal | SP32       | Abcam  |
| CD229    | Rat monoclonal                 | PIZCU426A  | CNIO   |
| CD229    | Mouse monoclonal               | 1.25       | UB     |
| CD229    | Mouse monoclonal               | 1.84       | UB     |
| CD3      | Rabbit polyclonal              | IR503      | FLEX   |
| GAPDH    | Mouse monoclonal               | FF26A      | CNIO   |
| PD1      | Mouse monoclonal               | NAT105C    | CNIO   |

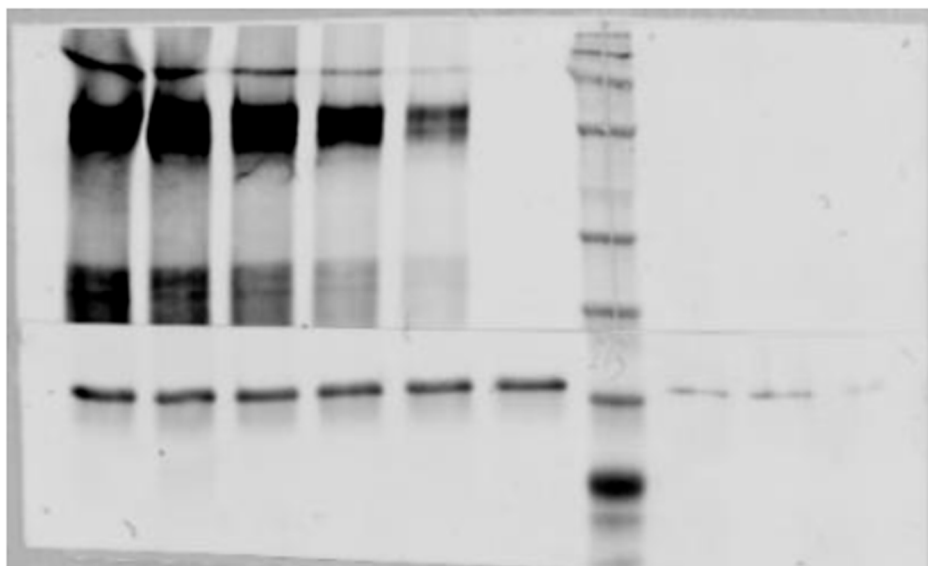

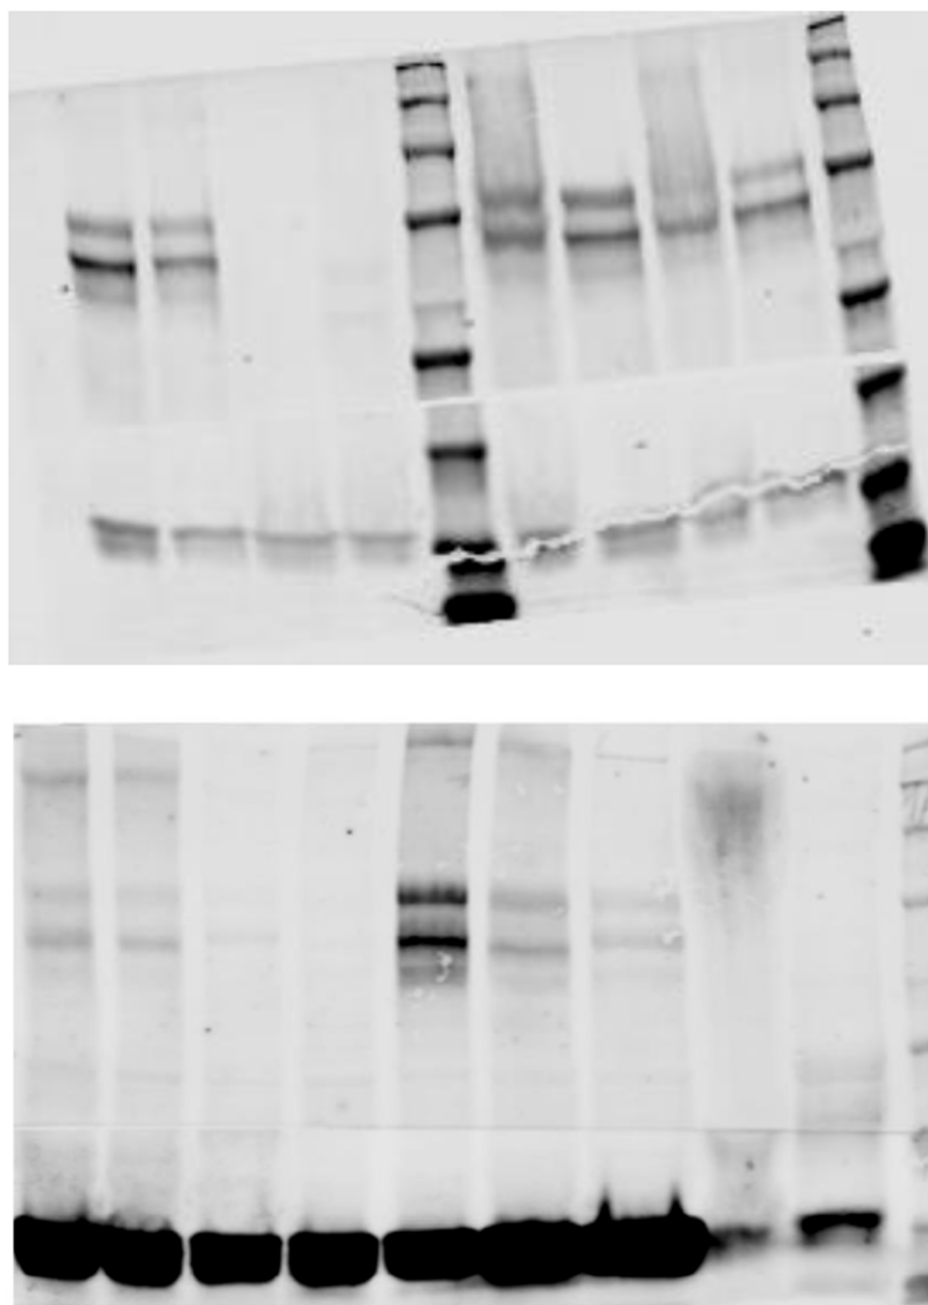

**Figure S4.** Raw images of WB from Figure S1.

**Publisher's Note:** MDPI stays neutral with regard to jurisdictional claims in published maps and institutional affiliations.

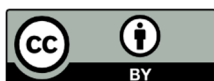

© 2022 by the authors. Licensee MDPI, Basel, Switzerland. This article is an open access article distributed under the terms and conditions of the Creative Commons Attribution (CC BY) license (<http://creativecommons.org/licenses/by/4.0/>).
